# Supplementary material
Source: Springer Nature journal article supplement (https://www.springermedizin.de/resource/supplementary/12955_2006_338_MOESM2_ESM.pdf/9560318)

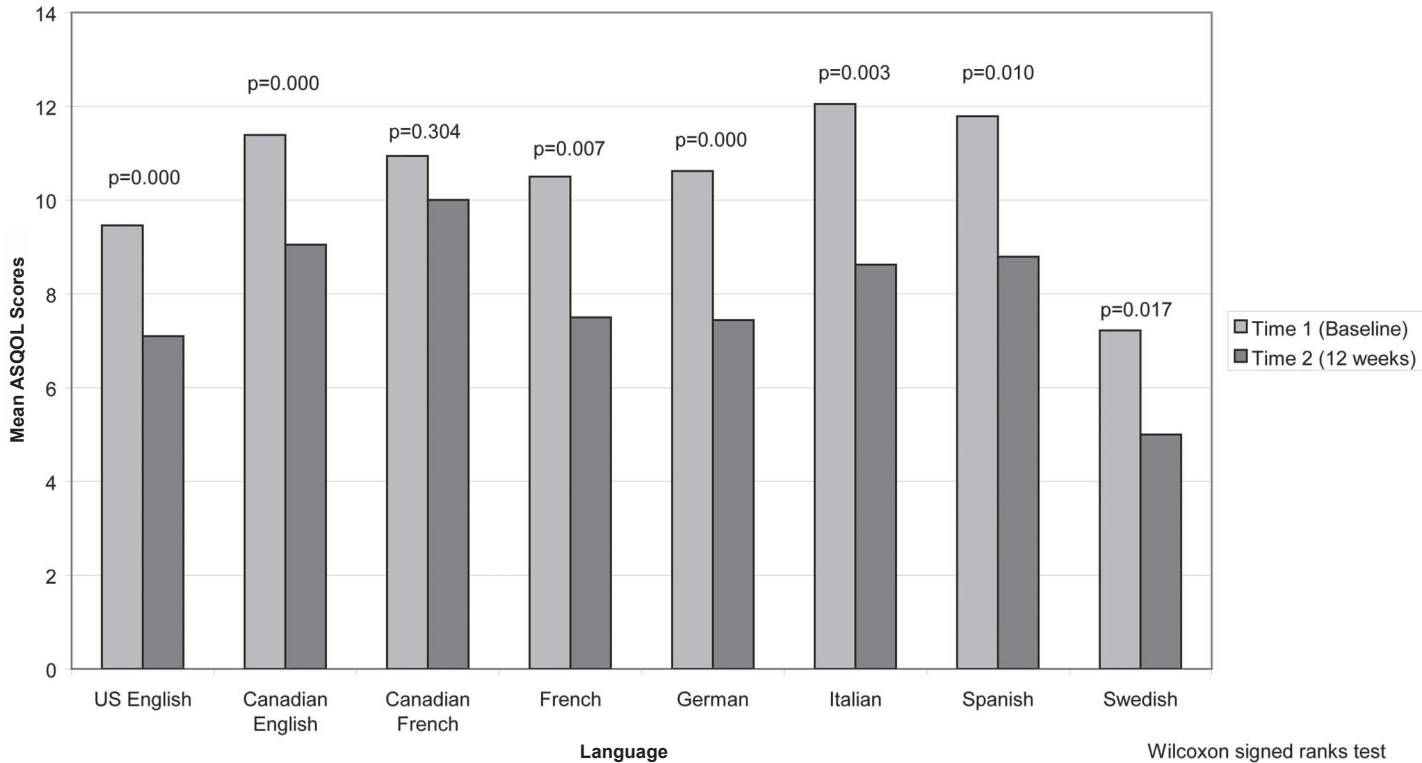

Supplement: MOESM2 [file 9560318]
